# Supplementary material for: Clinical Landscape of Central Serous Chorioretinopathy in Germany: Retina.net CSC Registry Report Number 1
Source: PubMed Central journal article supplement — Ophthalmologica. 2024 Feb 16;247(2):95–106. doi: 10.1159/000535930 (PMC11160426; doi:10.1159/000535930), 2024-02-16
Supplement: Supplementary_material-Suppl.1-s1.pdf [file Supplementary_material-Suppl.1-s1.pdf]

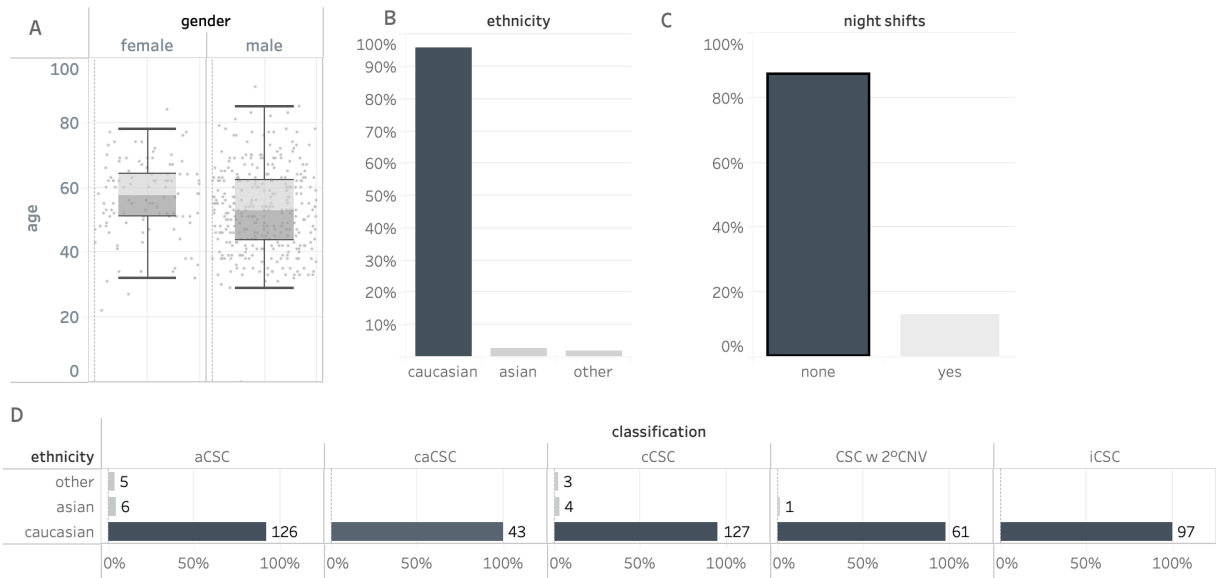

**Supplemental Figure 1:** Epidemiology of included patients on the day of informed consent. A) Age of enrolled males and females B) ethnicity of included patients and C) Percentage of employed patients working night shifts. D) Patient ethnicity by CSC subgroups. aCSC = acute CSC, cCSC = chronic CSC, iCSC = inactive CSC, caCSC = chronic atrophic CSC, CSC w 2° CNV = CSC with 2° CNV.
