# Supplementary material for: Clinical Landscape of Central Serous Chorioretinopathy in Germany: Retina.net CSC Registry Report Number 1
Source: PubMed Central journal article supplement — Ophthalmologica. 2024 Feb 16;247(2):95–106. doi: 10.1159/000535930 (PMC11160426; doi:10.1159/000535930), 2024-02-16
Supplement: Supplementary_material-Suppl.2-s2.pdf [file Supplementary_material-Suppl.2-s2.pdf]

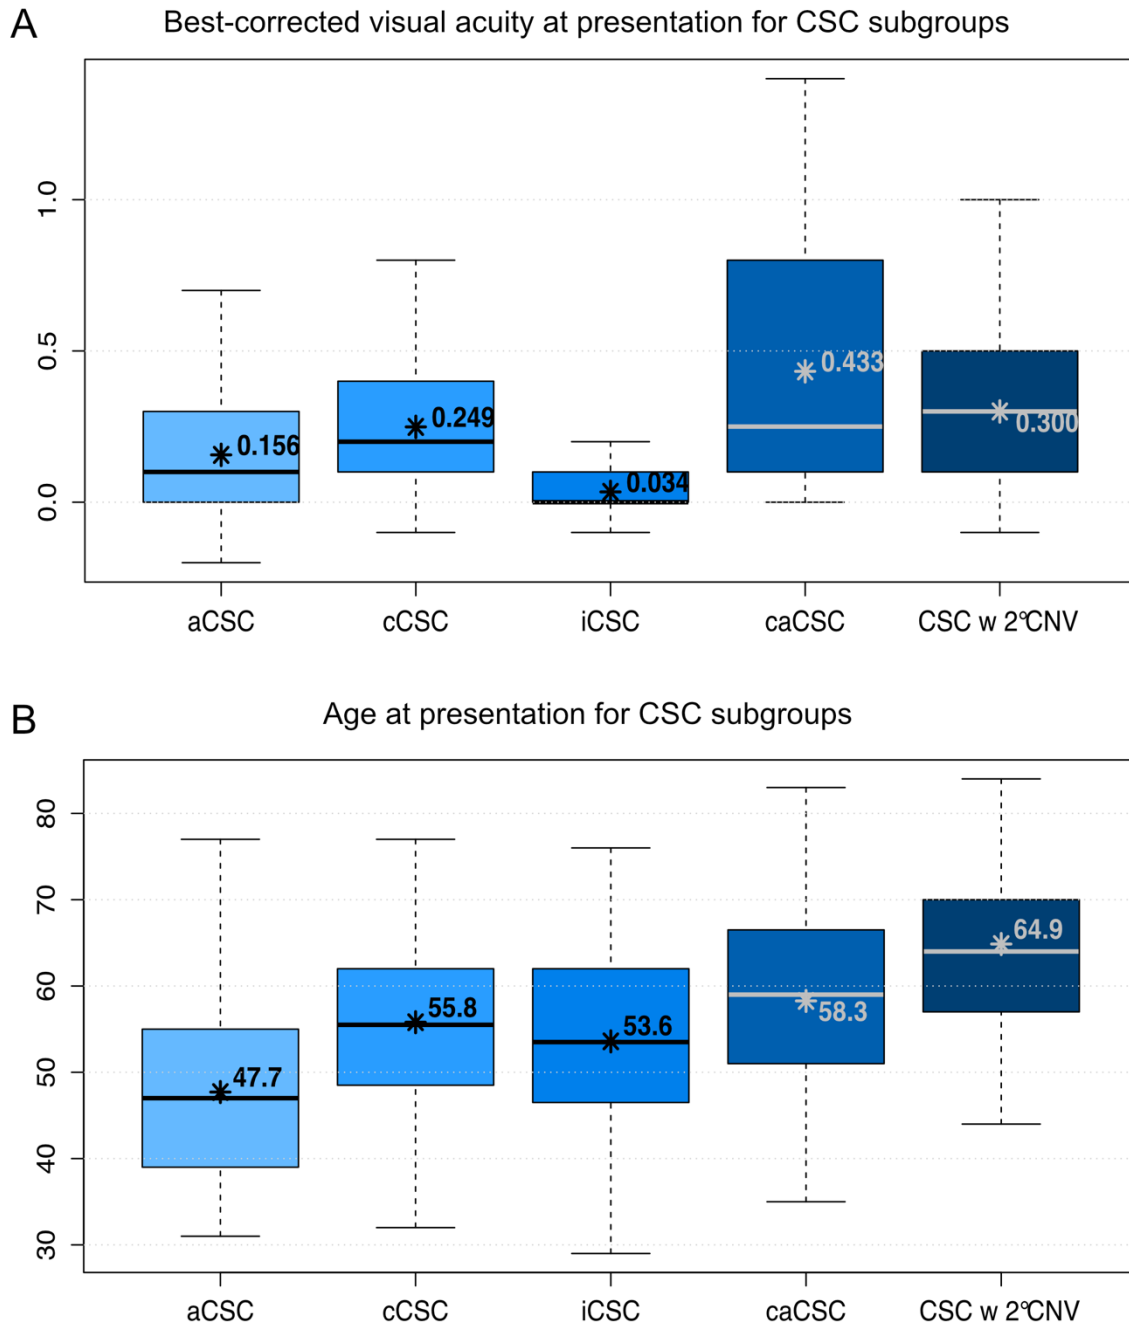

**Supplemental Figure 2:** Best-corrected visual acuity and age at enrollment for CSC subgroups. A) Logarithm of the minimum angle of resolution best-corrected visual acuity (logMAR BCVA) for CSC subgroups shows significantly worse BCVA in patients with chronic and chronic-atrophic CSC than in acute and inactive groups (Kruskal-Wallis p-value across all groups < 0.0001). B) Mean age at enrollment increases from acute via inactive to chronic, chronic-atrophic and secondary choroidal neovascularization subgroups (Kruskal-Wallis p-value across all groups < 0.0001). aCSC = acute CSC, cCSC = chronic CSC, iCSC = inactive CSC, caCSC = chronic atrophic CSC, CSC w 2° CNV = CSC with 2° CNV.
